# Supplementary material for: Mycogenic Metal Nanoparticles for the Treatment of Mycobacterioses
Source: PubMed Central journal article supplement (PMC7559022; doi:10.3390/antibiotics9090569), 2020-09-02
Supplement: antibiotics-09-00569-s001.pdf [file antibiotics-09-00569-s001.pdf]

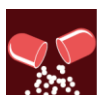

Supplementary Table 1. Recent reports on mycosynthesis of AgNPs.

| AgNPs size | AgNPs shape                     | Fungal species used on the synthesis                                                                                                                                                                                                                                                                                                           | Highlights                                                                                                                                                                                                                                                                              | Ref. |
|------------|---------------------------------|------------------------------------------------------------------------------------------------------------------------------------------------------------------------------------------------------------------------------------------------------------------------------------------------------------------------------------------------|-----------------------------------------------------------------------------------------------------------------------------------------------------------------------------------------------------------------------------------------------------------------------------------------|------|
| 3-30 nm    | Roughly spherical               | <i>Aspergillus niger</i>                                                                                                                                                                                                                                                                                                                       | Colloidal, stable and polydispersed. Antifungal activity against fungi, <i>A. niger</i> , and antibacterial activity against both Gram-positive, <i>Staphylococcus</i> sp. and <i>Bacillus</i> sp., and Gram-negative <i>Escherichia coli</i>                                           | [87] |
| ≈15 nm     | Spherical (face centered cubic) | Mycelia of <i>Rhizopus oryzae</i>                                                                                                                                                                                                                                                                                                              | Strong activity against <i>E. coli</i> and <i>Staphylococcus aureus</i> . Stable for 3 months                                                                                                                                                                                           | [88] |
| 8-60 nm    | Spherical                       | <i>Trichoderma</i> spp.:<br><i>T. asperellum</i> ,<br><i>T. harzianum</i> ,<br><i>T. longibrachiatum</i> ,<br><i>T. pseudokoningii</i> ,<br>and <i>T. virens</i><br><i>Alternaria</i> sp.,<br><i>Fusarium oxysporum</i> , <i>Curvularia</i> sp.,<br><i>Chaetomium indicum</i> , and<br><i>Phoma</i> sp.<br>(isolated from the leaves of ferns) | <i>T. virens</i> produced the highest concentration of AgNPs                                                                                                                                                                                                                            | [89] |
| 4-31 nm    | Spherical                       | <i>Fusarium oxysporum</i> , <i>Curvularia</i> sp.,<br><i>Chaetomium indicum</i> , and<br><i>Phoma</i> sp.<br>(isolated from the leaves of ferns)                                                                                                                                                                                               | Stable and polydispersed. Antiviral capacity against herpes simplex virus, types 1 (HSV-1) and 2 (HSV-2), and human parainfluenza virus type 3 (HPIV-3), reducing viral infectivity                                                                                                     | [90] |
| 25-30 nm   | Spherical                       | <i>Penicillium</i> sp. (endophytic; isolated from <i>Curcuma longa</i> )                                                                                                                                                                                                                                                                       | Well dispersed. Good activity against MDR <i>E. coli</i> and <i>S. aureus</i>                                                                                                                                                                                                           | [91] |
| NR         | NR                              | <i>Fusarium semitectum</i>                                                                                                                                                                                                                                                                                                                     | Activity against 4 different pathogens. Best activity against Gram-positive bacteria: highest against <i>Streptococcus pyogenes</i> , followed by <i>S. aureus</i> , <i>Pseudomonas aeruginosa</i> , and <i>Salmonella typhi</i>                                                        | [92] |
| 20-80 nm   | Spherical                       | <i>Candida albicans</i>                                                                                                                                                                                                                                                                                                                        | Significant antimicrobial activity, which was more pronounced against <i>S. aureus</i> than <i>E. coli</i>                                                                                                                                                                              | [93] |
| 3-30 nm    | Spherical                       | <i>Penicillium politans</i>                                                                                                                                                                                                                                                                                                                    | Activity against <i>Bacillus subtilis</i> , <i>Bacillus pumilus</i> , <i>Bacillus mycoides</i> , <i>S. aureus</i> , <i>E. coli</i> , and <i>C. albicans</i>                                                                                                                             | [94] |
| ≈60 nm     | Spherical                       | <i>Penicillium</i> spp.<br>(isolated from the plant <i>Glycosis mauritiana</i> )                                                                                                                                                                                                                                                               | Strong antioxidant, antibacterial, anti-inflammatory, antilipoxygenase, xanthine oxidase and tyrosine inhibitory activities                                                                                                                                                             | [95] |
| ≈22 nm     | Spherical                       | Calcium alginate encapsulated biomass of <i>Phoma exigua</i> var. <i>exigua</i>                                                                                                                                                                                                                                                                | Colloidal and stable NPs. Antibacterial activity against <i>E. coli</i> and <i>S. aureus</i>                                                                                                                                                                                            | [96] |
| 18-25 nm   | Spherical                       | Macro- and Micro-fungi from soil:<br><i>Pleurotus ostreatus</i><br><i>Lactarius glaucescens</i><br><i>Trichoderma strigosellum</i><br><i>Myrothecium verrucaria</i><br><i>Penicillium striatisporum</i>                                                                                                                                        | Activity against <i>Streptococcus pyogenes</i> , <i>S. aureus</i> , <i>Bacillus cereus</i> , <i>E. coli</i> , and <i>C. albicans</i> with enhanced synergistic effects with antibiotics. Highest antimicrobial potential against tested clinical pathogens found with AgNPs macrofungi. | [97] |

|                |                           |                                                                                                                                                                                                                                                                                            |                                                                                                                                                                                                                                                                                                                          |       |
|----------------|---------------------------|--------------------------------------------------------------------------------------------------------------------------------------------------------------------------------------------------------------------------------------------------------------------------------------------|--------------------------------------------------------------------------------------------------------------------------------------------------------------------------------------------------------------------------------------------------------------------------------------------------------------------------|-------|
| 4-16 nm        | Spherical and oval        | <i>Trichoderma viride</i>                                                                                                                                                                                                                                                                  | Activity against <i>B. mycooides</i> , <i>E. coli</i> , and <i>C. albicans</i> .<br>Use of statistical-aided approach (response surface methodology)                                                                                                                                                                     | [98]  |
| 50-70 nm       | Spherical                 | <i>Rhizopus arrhizus</i> ,<br><i>Trichoderma gamsii</i> ,<br>and <i>A. niger</i>                                                                                                                                                                                                           | Activity against all tested Gram-positive and -negative bacteria                                                                                                                                                                                                                                                         | [48]  |
| 12 nm          | Spherical                 | <i>Chaetomium globosum</i>                                                                                                                                                                                                                                                                 | Activity against <i>S. aureus</i> and<br><i>Klebsiella pneumoniae</i>                                                                                                                                                                                                                                                    | [99]  |
| 11-20 nm       | Spherical                 | <i>Penicillium</i> spp.                                                                                                                                                                                                                                                                    | Activity against the Gram-positive <i>S. aureus</i>                                                                                                                                                                                                                                                                      | [100] |
| 3-20           | Spherical                 | <i>A. niger</i>                                                                                                                                                                                                                                                                            | Activity against <i>B. mycooides</i> , <i>E. coli</i> , and <i>C. albicans</i><br>Synthesis optimization via statistical methods (central composite design)                                                                                                                                                              | [101] |
| ≈20-80 nm      | Spherical                 | <i>Aspergillus fumigatus</i>                                                                                                                                                                                                                                                               | Activity against <i>B. mycooides</i> , <i>E. coli</i> , and <i>C. albicans</i>                                                                                                                                                                                                                                           | [102] |
| ≈25 nm         | Spherical and tetrahedron | <i>Talaromyces purpureogenus</i>                                                                                                                                                                                                                                                           | Dispersed. Activity against several pathogenic bacteria                                                                                                                                                                                                                                                                  | [86]  |
| 10-35 nm       | Spherical                 | <i>Tritirachium oryzae</i>                                                                                                                                                                                                                                                                 | Polydispersed, with antimicrobial activity against drug-resistant or MDR bacteria (MIC = 6.38-19.15 µg/mL)                                                                                                                                                                                                               | [103] |
| 60-85 nm       | Anisotropic               | <i>A. niger</i> isolated from soil                                                                                                                                                                                                                                                         | Polydispersed, with antimicrobial activity against MDR <i>S. aureus</i> strains                                                                                                                                                                                                                                          | [104] |
| 4-26 nm        | Spherical                 | <i>A. niger</i> , <i>A. fumigatus</i> ,<br><i>Aspergillus flavus</i> , <i>Aspergillus nidulans</i> , <i>F. oxysporum</i> ,<br><i>Nigrospora oryzae</i> , <i>Penicillium chrysogenum</i> , and <i>Trichoderma harzianum</i> (endophytes isolated from the plant <i>Calotropis procera</i> ) | All AgNPs presented antibacterial activity, but those from <i>A. fumigatus</i> , <i>A. flavus</i> and <i>P. chrysogenum</i> , were the most active, with the last two also having the highest antifungal activity. <i>A. nidulans</i> , <i>N. oryzae</i> and <i>T. harzianum</i> did not present any antifungal activity | [105] |
| 182.5 ± 6.9 nm | Spherical                 | <i>T. harzianum</i>                                                                                                                                                                                                                                                                        | Antifungal activity                                                                                                                                                                                                                                                                                                      | [106] |
| 88 ± 7.3 nm    | Spherical                 | Co-culture of <i>T. harzianum</i> and <i>Sclerotinia sclerotium</i>                                                                                                                                                                                                                        | Antifungal activity                                                                                                                                                                                                                                                                                                      | [106] |
| 10-15 nm       | Spherical                 | Endophytic isolates of <i>Trichoderma atroviride</i>                                                                                                                                                                                                                                       | Antibacterial and antifungal activity                                                                                                                                                                                                                                                                                    | [55]  |

MDR, multidrug resistant; MIC, minimum inhibitory concentration; NPs, nanoparticles; Ref., reference.
